# Supplementary material
Source: PubMed Central journal article supplement (PMC9015808)
Supplement: erac029_suppl_supplementary_tables_s1-s4_figures_s1-s4.pdf [file erac029_suppl_supplementary_tables_s1-s4_figures_s1-s4.pdf]

# Overexpression mutants reveal a role for a chloroplast MPD protein in regulation of reactive oxygen species during chilling in Arabidopsis

Daniel Lunn, Gracen A. Smith, James G. Wallis, and John Browse

Institute of Biological Chemistry, Washington State University, Pullman, Washington 99164-6340

## Supplementary data:

**Table S1:** Growth measurements of Col-0, *mpd1-1* and *mpd1-2* at 22°C.

**Table S2:** The Mpv17\_PMP22 family in Arabidopsis.

**Table S3:** Growth measurements of MPD1-OX3 at 22°C.

**Table S4.** List of primers used for quantitative PCR analysis.

**Fig. S1:** Transmembrane domains of MPD1.

**Fig. S2:** *mpd1-1* is an overexpression allele.

**Fig. S3:** Level of *MPD1* transcript and phenotype for two MPD1 overexpression lines.

**Fig. S4:** Chilling phenotype of *MPD1-OX3* lines after recovery.

**Table S1.** Growth measurements of *mpd1-1* and *mpd1-2* at 22°C

| <b>Allele</b>        | <b>Rosette diameter<br/>(2wks 22°C)</b> | <b>Rosette diameter<br/>(5wks 22°C)</b> | <b>Dry weight</b>  |
|----------------------|-----------------------------------------|-----------------------------------------|--------------------|
| <b>Col-0</b>         | <b>3.04 ±0.16</b>                       | <b>10.2 ±0.2</b>                        | <b>320.3 ±21.3</b> |
| <b><i>mpd1-1</i></b> | <b>3.02 ±0.15</b>                       | <b>10.2 ±0.2</b>                        | <b>327.0 ±20.0</b> |
| <b><i>mpd1-2</i></b> | <b>3.07 ±0.16</b>                       | <b>10.25 ±0.0</b>                       | <b>328.7 ±20.2</b> |

Rosette diameters of plants grown at 22°C measured after two and five weeks of growth. The plants were then cultivated to maturity and the above-soil biomass collected, dried, and weighed. Data are means ± SD for n=30 plants (ten in each of three independent replicates).

**Table S2.** The Mpv17\_PMP22 family in Arabidopsis.

| <b>AGI<br/>Locus</b>         | <b>SUBA<br/>targeting<sup>1</sup></b> | <b>Predicted<br/>protein<br/>length</b> | <b>Identity<br/>(%)</b> | <b>Similarity<br/>(%)</b> | <b>Similarity Bit<br/>value</b> | <b>Chance<br/>expectation</b> |
|------------------------------|---------------------------------------|-----------------------------------------|-------------------------|---------------------------|---------------------------------|-------------------------------|
| <b>At4g03410<br/>(MPD1)</b>  | Chloroplast                           | 361                                     | 100                     | 100                       | 713                             | 0                             |
| <b>At1g52870</b>             | Chloroplast                           | 366                                     | 81                      | 91                        | 412                             | 8e-144                        |
| <b>At5g19750</b>             | Chloroplast                           | 288                                     | 21                      | 47                        | 57                              | 8e-09                         |
| <b>At4g04470<br/>(PMP22)</b> | Peroxisome                            | 190                                     | 20                      | 44                        | 97                              | 3e-04                         |
| <b>At2g42770</b>             | Peroxisome                            | 232                                     | 23                      | 44                        | 96                              | 6e-04                         |
| <b>At4g14305</b>             | Peroxisome                            | 185                                     | 25                      | 43                        | 55                              | 9e-09                         |
| <b>At2g14860</b>             | Mitochondria                          | 252                                     | 28                      | 46                        | 80                              | 5e-17                         |
| <b>At4g33905</b>             | Mitochondrion                         | 261                                     | 28                      | 47                        | 82                              | 2e-17                         |
| <b>At3g24570<br/>(MPV17)</b> | Mitochondrion                         | 235                                     | 23                      | 41                        | 60                              | 3e-10                         |
| <b>At5g43140</b>             | Mitochondrion                         | 254                                     | 23                      | 46                        | 72                              | 3e-14                         |

<sup>1</sup>Cellular localization as predicted by SUBA4 (<http://suba.live>). The Arabidopsis Araport11 database was searched with the MPD1 predicted protein sequence through the TAIR BLAST tool (<https://www.Arabidopsis.org/Blast/>) with no other significant homologies detected.

**Table S3.** Growth measurements of *MPD1-OX3* at 22°C.

| <b>Allele</b>          | <b>Rosette diameter<br/>(2wks 22°C)</b> | <b>Rosette diameter<br/>(5wks 22°C)</b> | <b>Dry weight</b> |
|------------------------|-----------------------------------------|-----------------------------------------|-------------------|
| <b>Col-0</b>           | <b>3.04±0.16</b>                        | <b>10.2±0.2</b>                         | <b>320.3±21.3</b> |
| <b><i>mpd1-1</i></b>   | <b>3.02±0.15</b>                        | <b>10.2±0.2</b>                         | <b>327.0±20.0</b> |
| <b><i>MPD1-OX3</i></b> | <b>3.00±0.13</b>                        | <b>10.3±0.2</b>                         | <b>325.1±18.0</b> |
| <b><i>iso-OX3</i></b>  | <b>3.11±0.12</b>                        | <b>10.2±0.1</b>                         | <b>318.5±18.4</b> |

Rosette diameters of plants grown at 22°C measured after two and five weeks of growth. The plants were then cultivated to maturity and the above soil biomass collected, dried, and weighed. Data are means ± SD for n=30 plants (ten in each of three independent replicates).

**Table S4.** List of primer used for RT-qPCR in this study.

| <b>Name</b> | <b>Sequence</b>            |
|-------------|----------------------------|
| Zat12-F     | AGTTTCATTCGTTCCAAGCC       |
| Zat12-R     | TCTCGTTCCTGTGTCTCCTC       |
| DHAR1-F     | AACCTCTCTGACAAACCCC        |
| DHAR1-R     | TCTTTGCTCTTCAAGAATGTCC     |
| CAT1-F      | TTCCCCTTTCTTCACTACAAAC     |
| CAT1-R      | AAACCCTTAGCACTGGCTC        |
| SOD1-F      | GATGGTGTGACCACTGTGAGTGGAA  |
| SOD1-R      | GGGCACCGTGTGTTTTACCATCG    |
| DHAR3-F     | GGCGGCGAGTCCTCTTGAAATCT    |
| DHAR3-R     | GAAGCCTTTTCAGGTGGGGTAGCA   |
| SOD2-F      | CGTCGAAAGCGTTGACAGTTGTTTC  |
| SOD2-R      | GAGCTCCGTGTGTCATGTTGTTAGG  |
| tAPX1-F     | TCCCGAGGGCATAGTCATTGAAAAC  |
| tAPX1-R     | GGGTAATGGCTTATCTGGGCTTCC   |
| Tub2-F      | ACTGTCTCCAAGGGTTCCAGGTTT   |
| Tub2-R      | ACCGAGAAGGTAAGCATCATGCGA   |
| mpd1-F      | GAAGGAAAACCGCTGTTTGAGTTTG  |
| mpd1-R      | TGGAAACGCAAGAGCCCTAAAACCTG |

MAALCCCPTTIIVSCKVSSRIKTACPLERINPFKNQKRLITERRNLIVKSIIEDREAIDVKND  
 NFKAE E E E L S E D K V E D T D R L M S R G I N A A I V L A A G T V A V T K L L T I D H D Y W Q G W T L Y E I L R Y A P E H  
 N W F A Y E Q I L K T N P V L A K M A I S G I V Y S L G D W I A Q C Y E C K P L E F D R T R V L R S G L V G F T L H G S L S  
 H Y Y Y Q F C E A L F P F Q E W W V V P A K V A F D Q T V W S A I W N S I Y F T V L G L L R F Q S P A D I F S E I K T T F L P  
 M L T A G W K L W P L A H L V T Y G V I P V D Q R L L W V D C I E L I W V T I L S T Y S N E K A E A Q A S E E T N S S S H S S  
 E V C Q V E L F S K N L S S K I S L E R L N V C S E C S S K L I C A C K Y L T G L G D I S M

**Fig. S1.** Transmembrane domains of MPD1. Analysis of the MPD1 protein sequence with the HMMTOP 2.0 server (<http://www.enzim.hu/hmmtop/>) reveals five predicted transmembrane domains, underlined in green. The Mpv17\_Pmp22 domain (red) and chloroplast targeting signal (blue) are indicated as in Figure 2b.

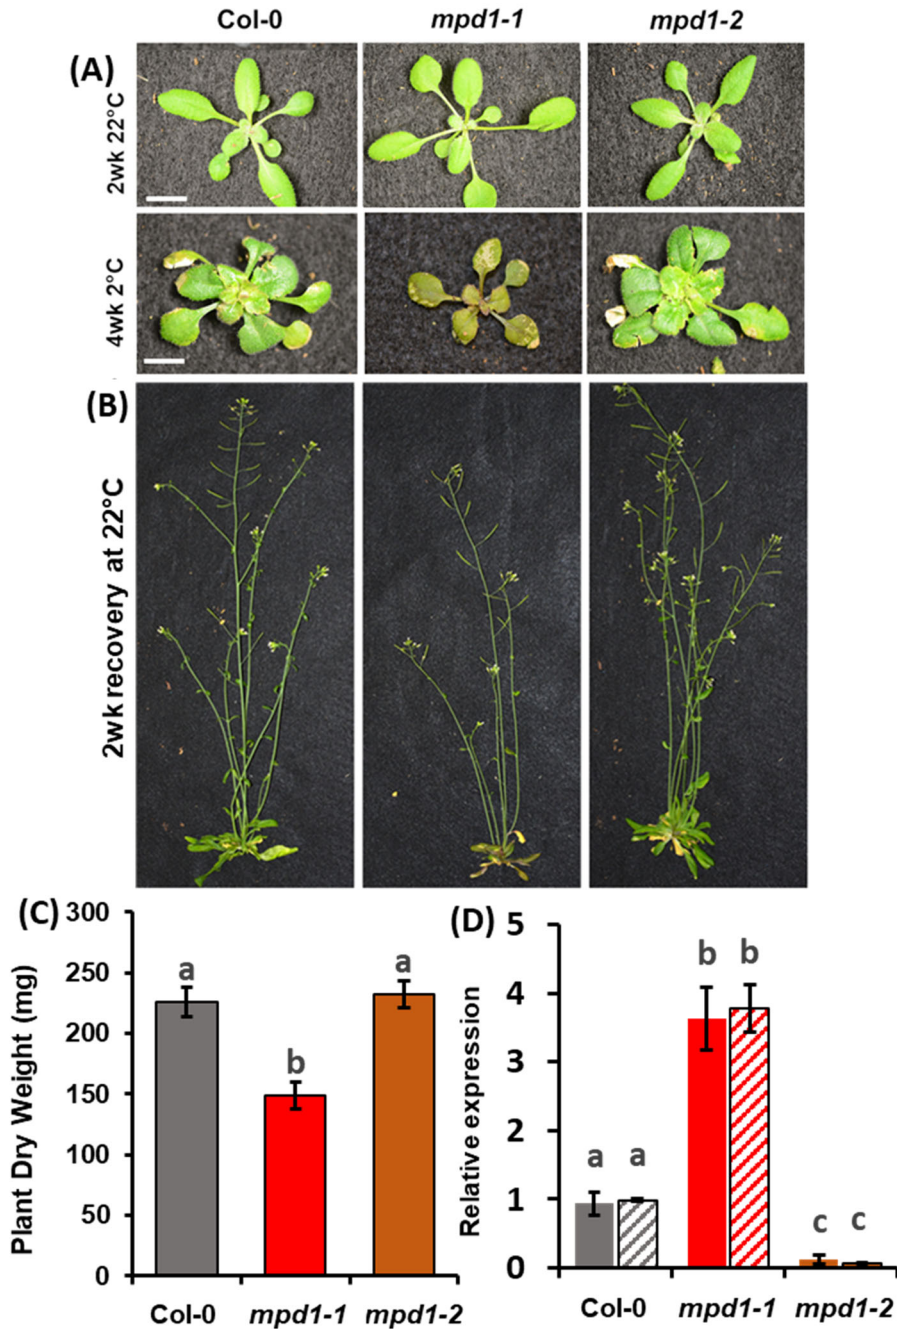

**Fig. S2.** *mpd1-1* is an overexpression allele. (A) After two-weeks growth at 22°C, *mpd1-1* and *mpd1-2* mutants resemble Col-0. After four weeks at 2°C, *mpd1-1* plants exhibit chilling damage, but *mpd1-2* plants still resemble Col-0. (B) After eight weeks at 2°C and two weeks recovery at 22°C, *mpd1-1* plants remain smaller than Col-0 and *mpd1-2*. (C) Dry weights after eight weeks at 2°C and two weeks recovery at 22°C for Col-0, *mpd1-1* and *mpd1-2*. (D) Expression of *MPD1* relative to *tub2* in plants after two weeks at 22°C (solid) and after a further four weeks at 2°C (hatched). In (A) scale bar is 1cm. In (C) data are means  $\pm$  SD for n=30 plants (ten in each of three independent replicates). In (D) data are means  $\pm$  SD for n=3 biological replicates of leaves pooled from 10 plants. Statistical analysis by one-way ANOVA and post hoc Tukey test, letters denoting significance ( $p < 0.001$ ).

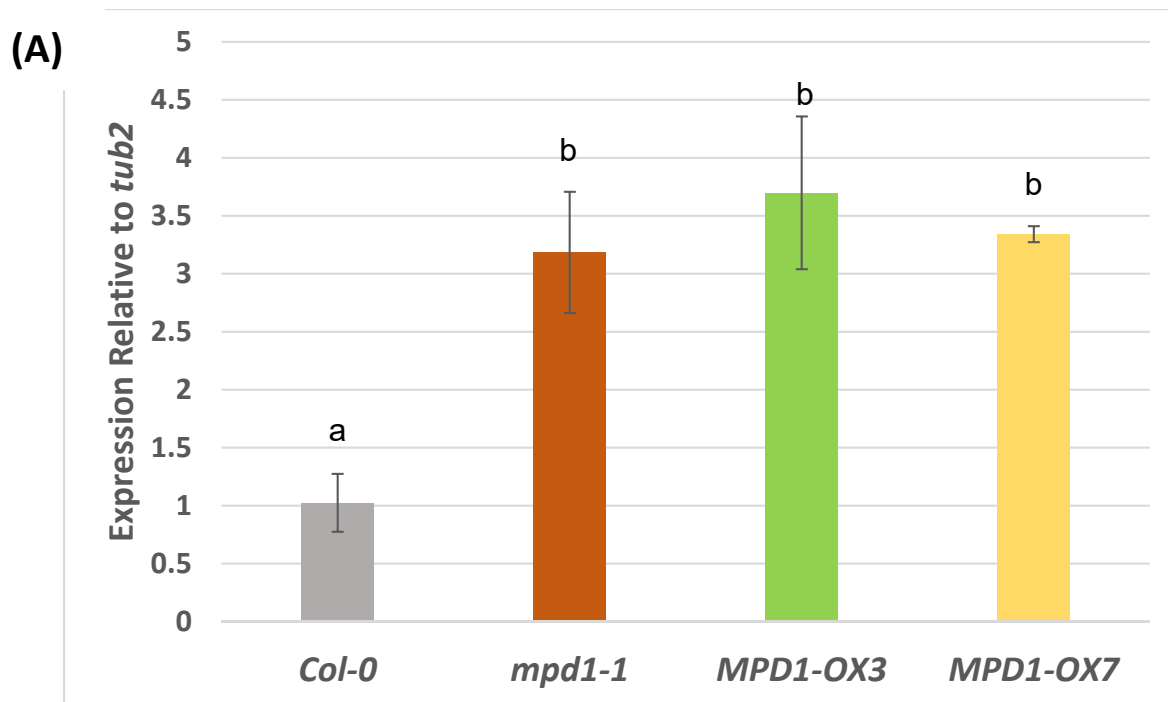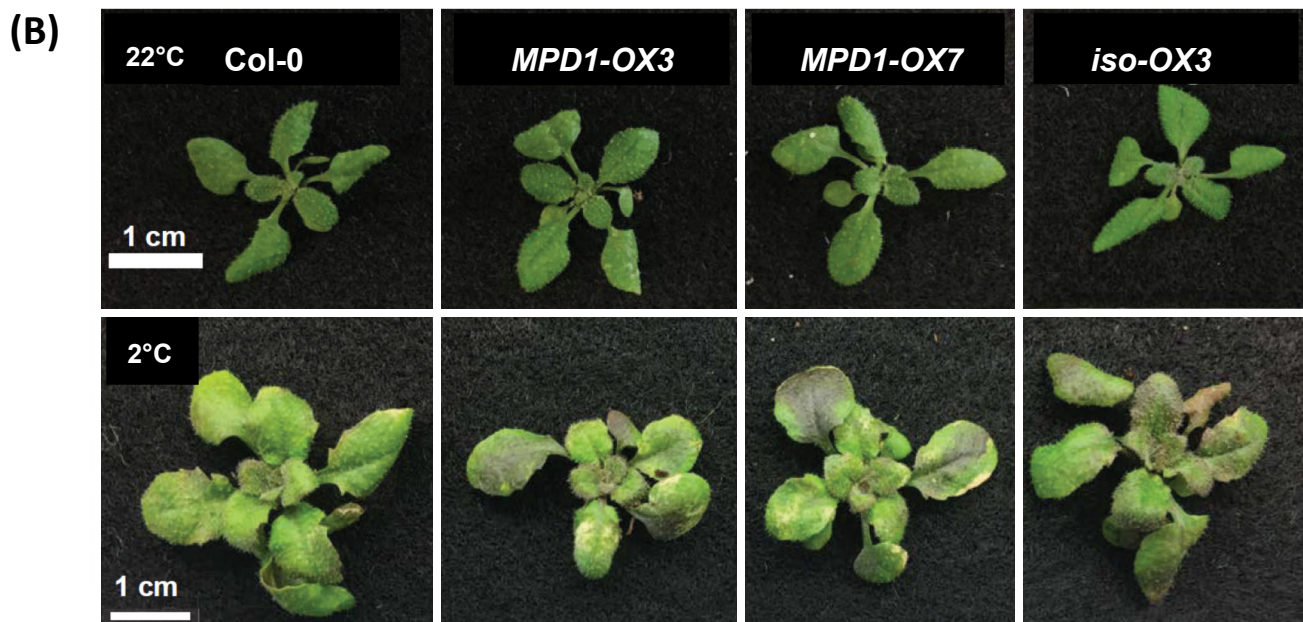

**Fig. S3:** Level of *MPD1* transcript and phenotypes for two *MPD1*-overexpression lines. (A) Relative expression *MPD1* transcript in leaves of *Col-0*, *mpd1-1*, *MPD1-OX3*, and *MPD1-OX7* plants, normalized to expression of the constitutive *tub2* (*At5g62690*) gene. (B) Phenotypes of *Col-0*, *MPD1-OX3* and *MPD1-OX7* lines after two weeks at 22°C (top) and after four weeks at 2°C (bottom). *iso-OX3* is an untransformed isogenic segregant from the parent of *MPD1-OX3*. (A) Means  $\pm$  SE for  $n=3$  biological replicates of leaves pooled from 10 plants. Analysis by one-way ANOVA with post hoc Tukey test; letters applied to columns mark significance ( $p < 0.001$ ).



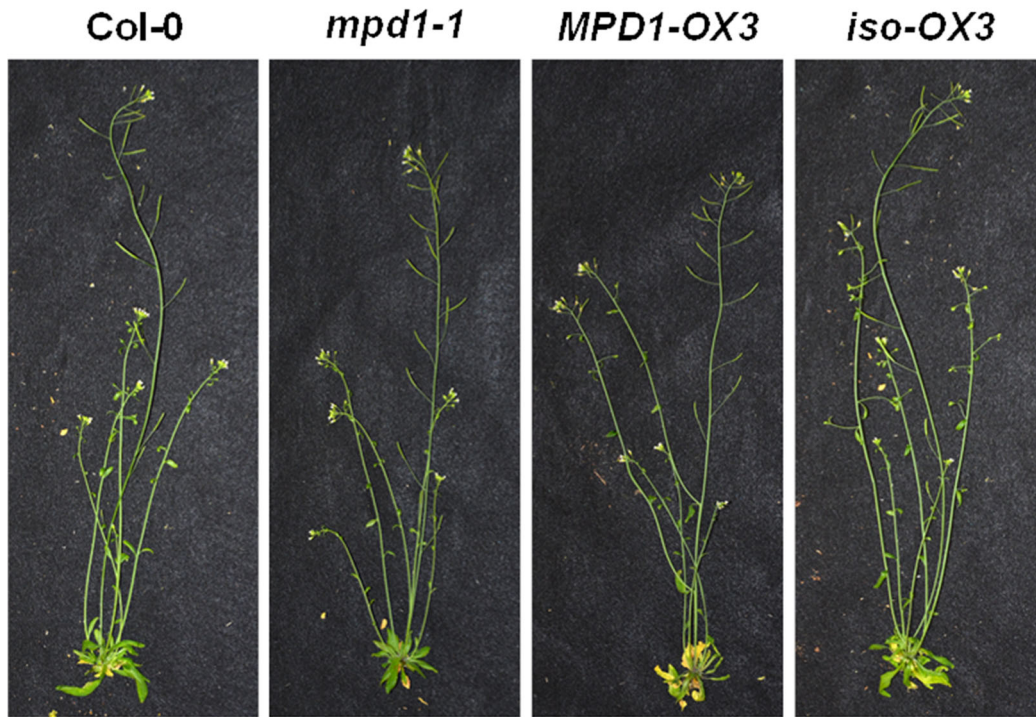

**Fig. S4:** Chilling recovery phenotype of *MPD1-OX3* line. Representative *mpd1-1*, *MPD1-OX3*, and *iso-OX3* plants compared to Col-0. After initial cultivation at 22°C for two weeks the plants were subjected to growth at 2°C for 8 weeks, then allowed to recover at 22°C for two weeks before they were photographed. The *iso-OX3* line is an isogenic sibling segregant of *MPD1-OX3*.
